# Supplementary material
Source: PubMed Central journal article supplement (PMC6556589)
Supplement: supp_RA119.008439_144308_1_supp_313590_ppr4dy.pdf [file supp_RA119.008439_144308_1_supp_313590_ppr4dy.pdf]

**Table S1**  
**Bacterial strains, plasmids and primers.**

| <b>Strain</b>   | <b>Description</b>                                       | <b>Source</b>                          |
|-----------------|----------------------------------------------------------|----------------------------------------|
| AH1263          | USA300 Nebraska Collection                               | (1)                                    |
| PDJ68           | $\Delta ohyA$ of AH1263                                  | This study                             |
| JLB2            | $\Delta fakA$ of AH1263                                  | (2)                                    |
| <b>Plasmids</b> | <b>Description</b>                                       | <b>Source</b>                          |
| pPJ520          | pET-28-derived <i>SaOhyA</i> expression vector           | This study                             |
| pPJ523          | Allelic replacement vector to construct $\Delta ohyA$    | This study                             |
| pPJ480          | <i>S. aureus</i> expression vector, <i>sarA</i> promoter | This study                             |
| pPJ490          | <i>ohyA</i> expression vector from pPJ480                | This study                             |
| pCS119          | Expression vector used for construction of pPJ480        | (3)                                    |
| <b>Primers</b>  | <b>Sequence (5' to 3')</b>                               | <b>Purpose</b>                         |
| OhyA-Up-F       | AGGCCCTTTTCGTCTTCAAGAATTTCGAGCTCCAATAATTCTCTTGCCGTTTCG   | PCR of <i>Sa0103</i> arm               |
| OhyA-Up-R       | GCAAATCTTGGTGGTCATTCATCCACCAAGTCCTTTTCG                  |                                        |
| OhyA-Dn-F       | CGAAAGGACTTGGTGGATGAATGACCACCAAGATTTGC                   | PCR of <i>Sa0101</i> arm               |
| OhyA-Dn-R       | AATCAGAGCTTGCATGCCTGCAGGTCGACAGACCGAAGAATAGTGAACC        |                                        |
| OhyA-F3         | CGGCTTCATCGCTTTTCAC                                      | Genotyping: WT = 3148 bp; KO = 1502 bp |
| OhyA-R6         | AGCGAGTATTGGATTTGTAGAC                                   |                                        |
| pCS119-a2398t-F | GCTTTTTCTCTTTCTATTATTCCTTGGACTTCATTTACTGGGTTTAA          | mutate <i>NcoI</i> site in CS119       |
| pCS119-g3141c-F | CTAAAAACCTACAGAACCTTGGCACTGGCCGTC                        |                                        |
| SA2339-F3       | TGGCAACGCTAGGATTTACAACATTA                               | qPCR primers for <i>farE</i>           |
| SA2339-R3       | GCTAGCATTGGTCCTGTCGTTTC                                  |                                        |
| Sa0108-F4       | GCAGGTGGTAGTCTTGATGGTG                                   | qPCR primers for <i>SaOhyA</i>         |
| Sa0108-R4       | CTAAACGTTGACCCTGTTTCTC                                   |                                        |

1. Parsons, J. B., Broussard, T. C., Bose, J. L., Rosch, J. W., Jackson, P., Subramanian, C., and Rock, C. O. (2014) Identification of a two-component fatty acid kinase responsible for host fatty acid incorporation by *Staphylococcus aureus*. *Proc. Natl. Acad. Sci. U. S. A.* **111**, 10532-10537
2. Fey, P. D., Endres, J. L., Yajjala, V. K., Widhelm, T. J., Boissy, R. J., Bose, J. L., and Bayles, K. W. (2013) A genetic resource for rapid and comprehensive phenotype screening of nonessential *Staphylococcus aureus* genes. *MBio* **4**, e00537-00512
3. Ericson, M. E., Subramanian, C., Frank, M. W., and Rock, C. O. (2017) Role of fatty acid kinase in cellular lipid homeostasis and SaeRS-dependent virulence factor expression in *Staphylococcus aureus*. *mBio* **8**, e00988-00917
